# Supplementary material for: Origin Sample Prediction and Spatial Modeling of Antimicrobial Resistance in Metagenomic Sequencing Data
Source: PubMed Central journal article supplement (PMC7983949; doi:10.3389/fgene.2021.642991), 2021-03-04
Supplement: Data_Sheet_2.pdf [file Data_Sheet_2.pdf]

## ***Supplementary Material***

### **1 SUPPLEMENTARY DATA**

The following files contain OTU (operational taxonomic units ) count data of RPKM (reads per kilobase per million mapped reads) data using AMR and proGenomes reference database in kaiju classifier.

**AMR\_counts.csv:**

Counts derived from kaiju using the AMR database from NCBI as a reference for CSD16 and CSD17 samples

**proGenome\_counts.csv:**

Counts derived from kaiju using proGenomes database as a reference for CSD17 samples

**Mystery\_counts.csv:**

Counts derived from kaiju using proGenomes database as a reference for Mystery samples

The following files contain metadata associated with the samples

**Metadata\_AMR.csv:**

Metadata for AMR (Antimicrobial resistance) counts samples for CSD16 and CSD17 samples

**Metadata\_proGenomes.csv:**

Metadata for proGenomes counts for CSD7 samples

**Metadata\_mystery.csv:**

Metadata for proGenomes counts for mystery samples

**Weather.csv:**

Weather related metadata

**NYC\_meta.csv:**

Population and density of New York City by Zip code queried from

<http://www.usa.com/rank/new-york-state-population-density-zip-code-rank.htm>

**amr.fmi:** AMR database used in kaiju. The accession numbers are from

<https://www.ncbi.nlm.nih.gov/pathogens/antimicrobial-resistance/>

The following files contain R scripts used in the analysis. Packages required to run the analysis are: ape, CARBayes, caret, geosphere, forestplot, pheatmap, RANN

**Spatial.R:**

Bayesian hierarchical Model (BYM) using CARBayes package

**Moran.R:**

Testing for spatial correlation using Moran's I test

**Predict. R:**

Prediction using GBM, Random Forest and NNet with caret package

**Tables.R:**

Wrapper code to generate the Tables in the paper

**Figures.R:**

Wrapper code to generate the Figures in the paper

**Predictors.Rdata:**

Features from the Recursive feature elimination (RFE) method

**2 SUPPLEMENTARY TABLES AND FIGURES****2.1 Tables**

|               | Sampling Day |       |
|---------------|--------------|-------|
|               | CSD16        | CSD17 |
| Barcelona     | 38           |       |
| Berlin        | 37           |       |
| Denver        | 23           | 22    |
| Doha          | 50           | 15    |
| Fairbanks     | 42           |       |
| Ilroin        | 25           | 36    |
| Lisabon       | 19           |       |
| New York      | 33           | 50    |
| Offa          | 9            | 14    |
| Santiago      | 13           |       |
| Stockholm     |              | 50    |
| Hong Kong     |              | 49    |
| Seoul         |              | 48    |
| Kiev          |              | 48    |
| Kuala Lumpur  |              | 30    |
| London        |              | 37    |
| Sao Paulo     |              | 29    |
| San Francisco |              | 29    |
| Singapore     |              | 48    |
| Taipei        |              | 50    |
| Tokyo         |              | 50    |
| Sendai        |              | 32    |
| Zurich        |              | 33    |

**Table S1.** Number of samples analyzed for each of the sampling days CSD16 and CSD17.
